# Supplementary material
Source: PubMed Central journal article supplement (PMC9412829)
Supplement: jamaotolaryngolheadnecksurg-e222291-s001.pdf [file jamaotolaryngolheadnecksurg-e222291-s001.pdf]

## Supplemental Online Content

Tang AL, O'Neil T, McDermott S, et al. Association of neoadjuvant pembrolizumab for oral cavity squamous cell carcinoma with adverse events after surgery in treatment-naive patients. *JAMA Otolaryngol Head Neck Surg*. Published August 25, 2022. doi:10.1001/jamaoto.2022.2291

### **eTable.** Pretreatment Clinical Stage and Postoperative Pathological Stage

This supplemental material has been provided by the authors to give readers additional information about their work.

eTable. Pretreatment Clinical Stage and Postoperative Pathological Stage

| Pembrolizumab Group   |         |                            |         |
|-----------------------|---------|----------------------------|---------|
| Pre-op Clinical Stage |         | Post-op Pathological Stage |         |
| TNM                   | Overall | TNM                        | Overall |
| T4aN0M0               | 4a      | T4aN1M0                    | 4a      |
| T3N2bM0               | 4a      | T3N3bM0                    | 4b      |
| T3N3bM0               | 4b      | T3N3bM0                    | 4b      |
| T2N1M0                | 3       | T2N1M0                     | 3       |
| T3N0M0                | 3       | T1N0M0                     | 1       |
| T4aN2bM0              | 4a      | T3N3bM0                    | 4b      |
| T2N2bM0               | 4a      | T1N0M0                     | 1       |
| T4aN1M0               | 4a      | T4aN0Mx                    | 4a      |
| TxN3bM0               | 4b      | T1N3bM0                    | 4b      |
| T1N2cM0               | 4a      | T4aN3bM0                   | 4b      |
| T2N2bM0               | 4a      | T4aN3bM0                   | 4b      |
| T2N2bM0               | 4a      | T0N0M0                     | -       |
| T1N2cM0               | 4a      | T0N1M0                     | -       |
| T4aN2bM0              | 4a      | T3N3bM0                    | 4b      |
| T4N0M0                | 4a      | T4aN0M0                    | 4a      |
| T4aN2cM0              | 4a      | T2N3bM0                    | 4b      |
| T2N2bM0               | 4a      | T2N0M0                     | 2       |
| T4aN2bM0              | 4a      | T4aN2bM0                   | 4a      |
| T4aN2bM0              | 4a      | T4aN3bM0                   | 4b      |
| T4aN2cM0              | 4a      | T4aN3bM0                   | 4b      |
| T3N2cM0               | 4a      | T4aN0M0                    | 4a      |
| T4aN2cM0              | 4a      | T4aN3bM0                   | 4b      |
| T4aN0M0               | 4a      | T4aN0M0                    | 4a      |
| T4N2bM0               | 4a      | T4aN0M0                    | 4a      |
| T2N2bM0               | 4a      | T1N2bM0                    | 4a      |
| T3N2cM0               | 4a      | T4aN3bM0                   | 4b      |
| T2N2bM0               | 4a      | T3N3bM0                    | 4b      |
| T4aN1M0               | 4a      | T4aN3bM0                   | 4b      |
| T4aN2bM0              | 4a      | T3N0M0                     | 3       |
| T4aN1M0               | 4a      | T4aN0M0                    | 4a      |
| T4aN2bM0              | 4a      | T4aN3bM0                   | 4b      |
| T4aN2bM0              | 4a      | T4aN0Mx                    | 4a      |

| Control Group         |         |                            |         |
|-----------------------|---------|----------------------------|---------|
| Pre-op Clinical Stage |         | Post-op Pathological Stage |         |
| TNM                   | Overall | TNM                        | Overall |
| T2N0M0                | 2       | T2N2bM0                    | 4a      |
| T2N0M0                | 2       | T2N0M0                     | 2       |
| T4aN0M0               | 4a      | T4aN3bM0                   | 4b      |
| T2N1M0                | 3       | T2N3bM0                    | 4b      |
| T4aN0M0               | 4a      | T4aN0M0                    | 4a      |
| T4aN0M0               | 4a      | T4aN0M0                    | 4a      |
| T3N2bM0               | 4a      | T3N2bM0                    | 4a      |
| T4aN0M0               | 4a      | T4aN0M0                    | 4a      |
| T2N2bM0               | 4a      | T2N2bM0                    | 4a      |
| T2N2bM0               | 4a      | T2N2bM0                    | 4a      |
| T3N2cM0               | 4a      | T3N3bM0                    | 4b      |
| T4aN2aM0              | 4a      | T4aN2aM0                   | 4a      |
| T4aN0M0               | 4a      | T4aN0M0                    | 4a      |
| T4aN0M0               | 4a      | T4aN0M0                    | 4a      |
| T2N3bM0               | 4b      | T2N3bM0                    | 4b      |
| T2N2bM0               | 4a      | T2N2bM0                    | 4a      |
| TxN3bM0               | 4b      | T4aN3bM0                   | 4b      |
| T3N1M0                | 3       | T3N3bM0                    | 4b      |
| T1N0M0                | 1       | T1N0M0                     | 1       |
| T4aN2bM0              | 4a      | T4aN2bM0                   | 4a      |
| T3N3bM0               | 4b      | T3N3bM0                    | 4b      |
| T4aN3bM0              | 4b      | T4aN3bM0                   | 4b      |
| T4bN1M0               | 4b      | T4aN0M0                    | 4a      |
| T2N0M0                | 2       | T3N0M0                     | 3       |
| T4aN0M0               | 4a      | T4aN0M0                    | 4a      |
| T1N0M0                | 1       | T1NxM0                     | -       |
| T3N0M0                | 3       | T2N1M0                     | 3       |
| T4aN2cM0              | 4a      | T4aN2cM0                   | 4a      |
| T4aN3bM0              | 4b      | T4aN3bM0                   | 4b      |
| T4aN1M0               | 4a      | T4aN2bM0                   | 4a      |
| T3N2cM0               | 4a      | T4aN3bM0                   | 4b      |
